# Supplementary material for: Incorporation of graphene nanodots and oxygen defects triggers robust coupling between solar energy and reactive oxygen
Source: Royal Society of Chemistry journal article supplement (doi:10.1039/c6ta10114c), 2017-01-01
Supplement: c6ta10114c1.pdf [file c6ta10114c1.pdf]

## Supporting Information

### **Graphene nanodots and oxygen defects incorporation triggers robust energy coupling between solar and reactive oxygen**

YuchenHao, Xiaoli Dong\*, Xiuying, Wang, Hongchao Ma, and Xiufang Zhang

*School of Light Industry and Chemical Engineering, Dalian Polytechnic University,  
Dalian, Liaoning, 116034, P.R. China.*

*\*Corresponding author. E-mail: dongxl@dlpu.edu.cn*

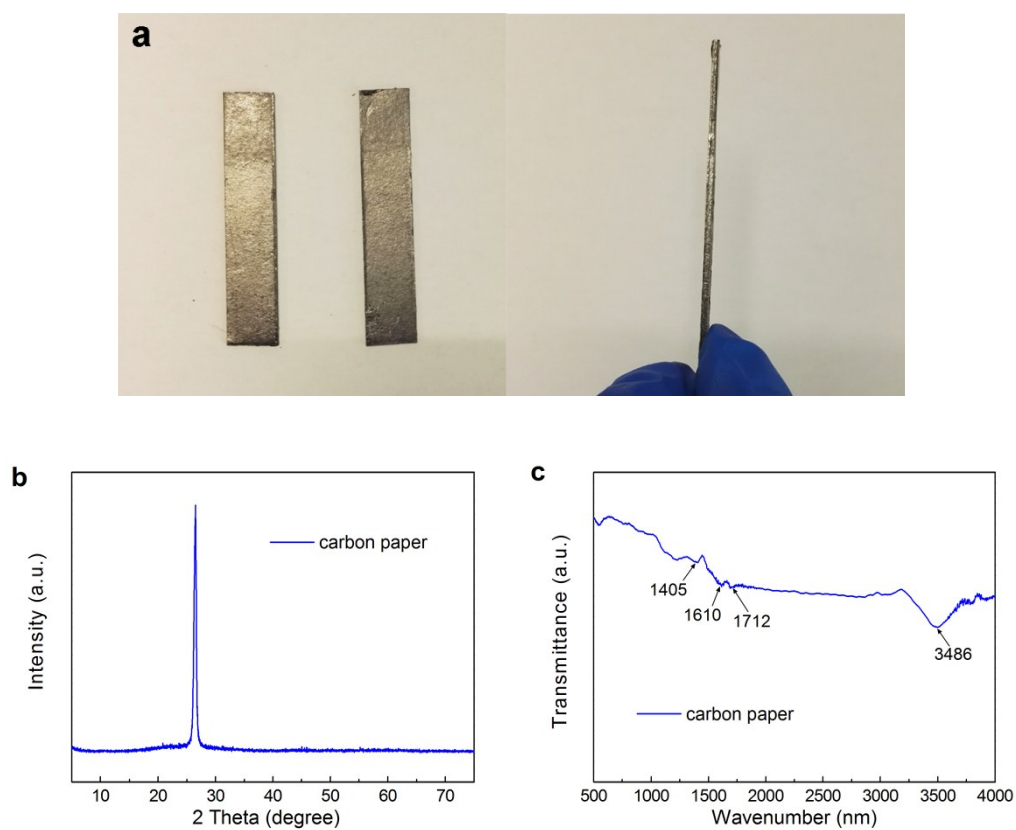

**Fig. S1.** The photographs (a), XRD pattern (b) and FT-IR spectra (c) of carbon paper.

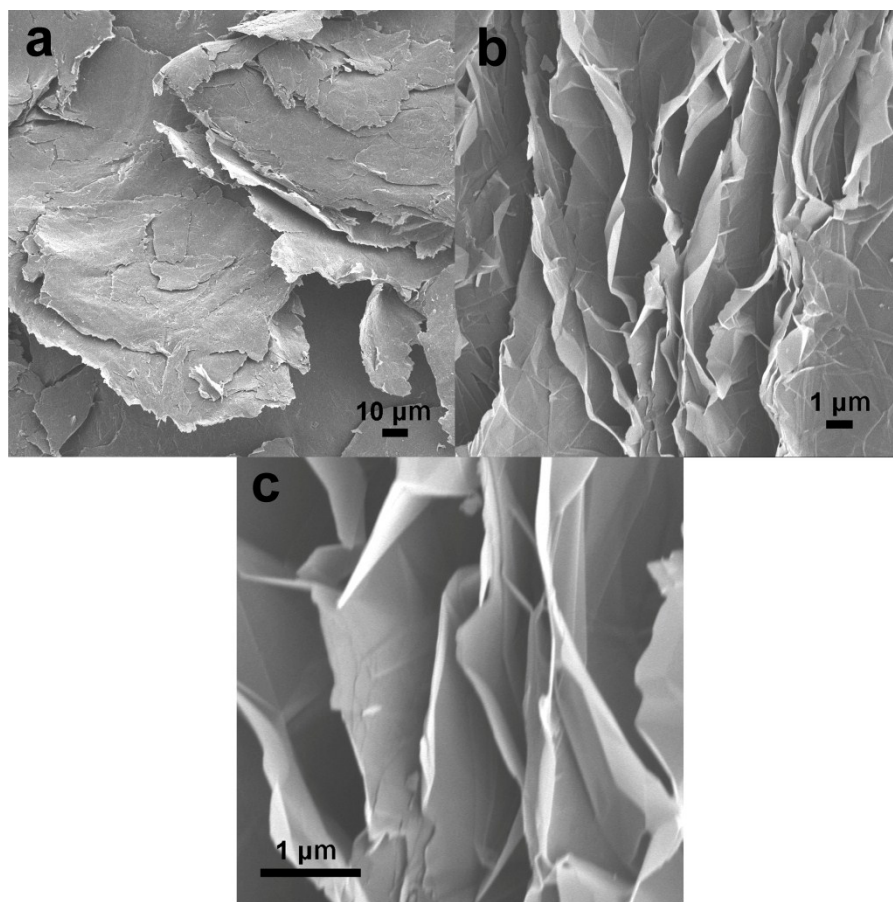

**Fig. S2.** The SEM images of carbon paper.

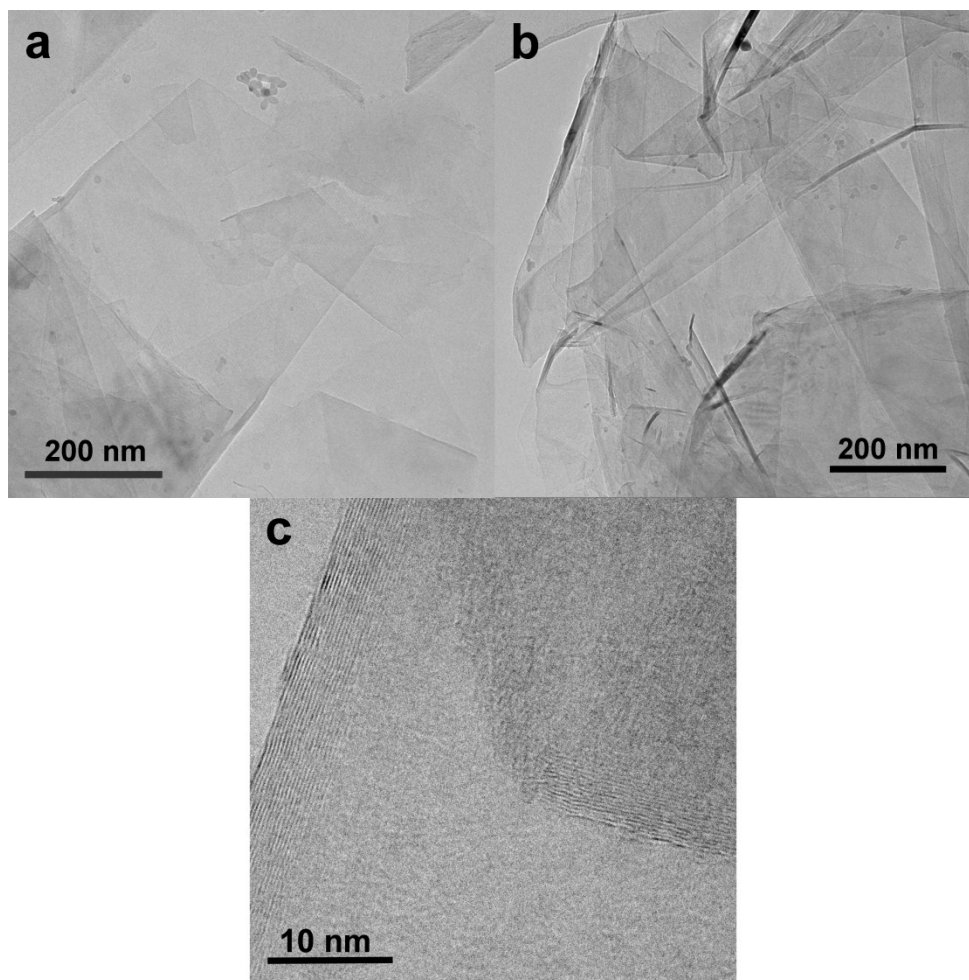

**Fig. S3.** (a)-(b) TEM images, (c) HRTEM image.

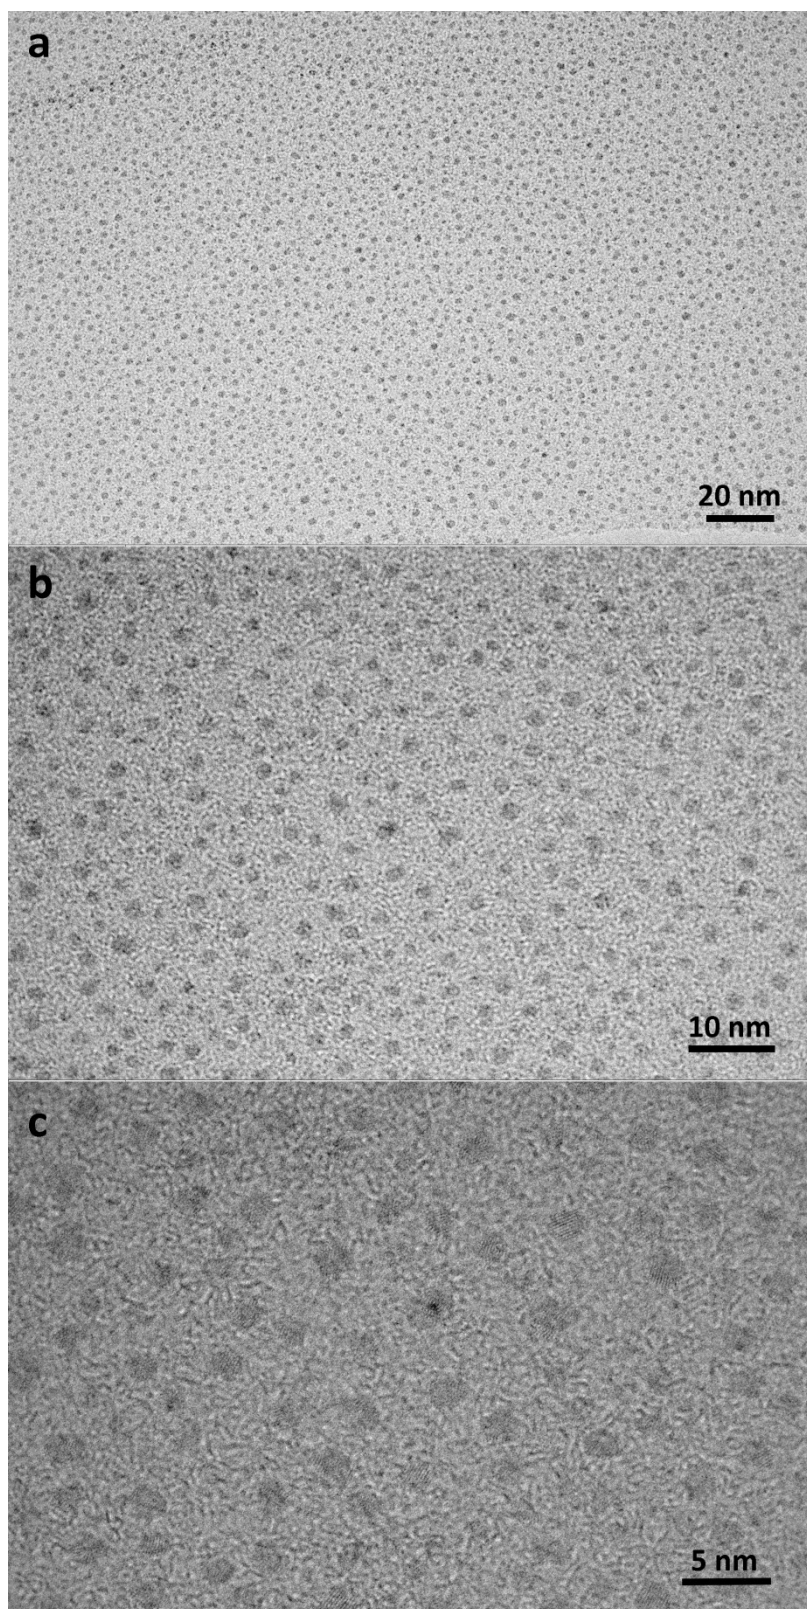

**Fig. S4.** TEM images of the as-prepared GDs.

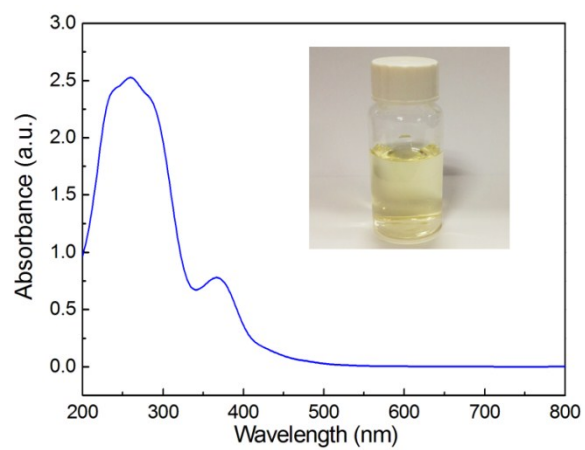

**Fig. S5.** Ultraviolet-visible spectra of the as-prepared GDs.

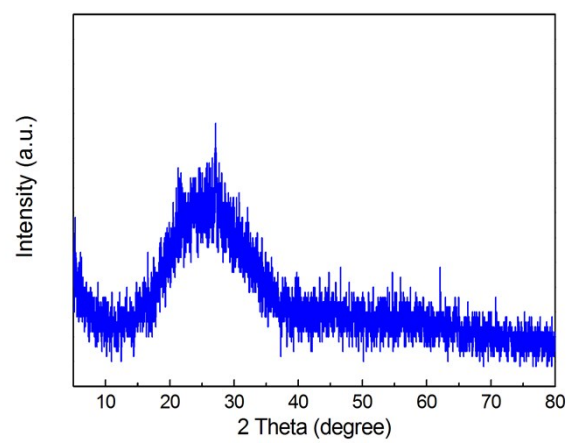

**Fig. S6.** XRD pattern of the as-prepared GDs.

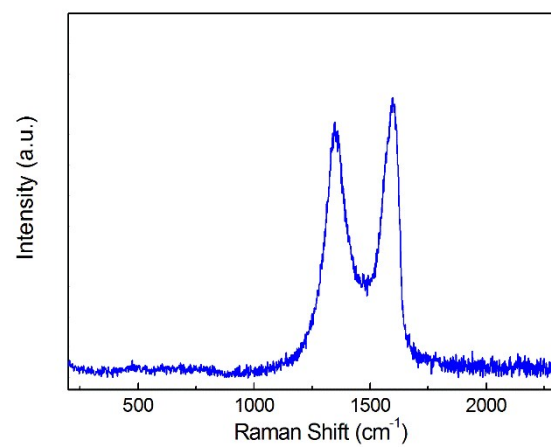

**Fig. S7.** Raman spectra of the as-prepared GDs.



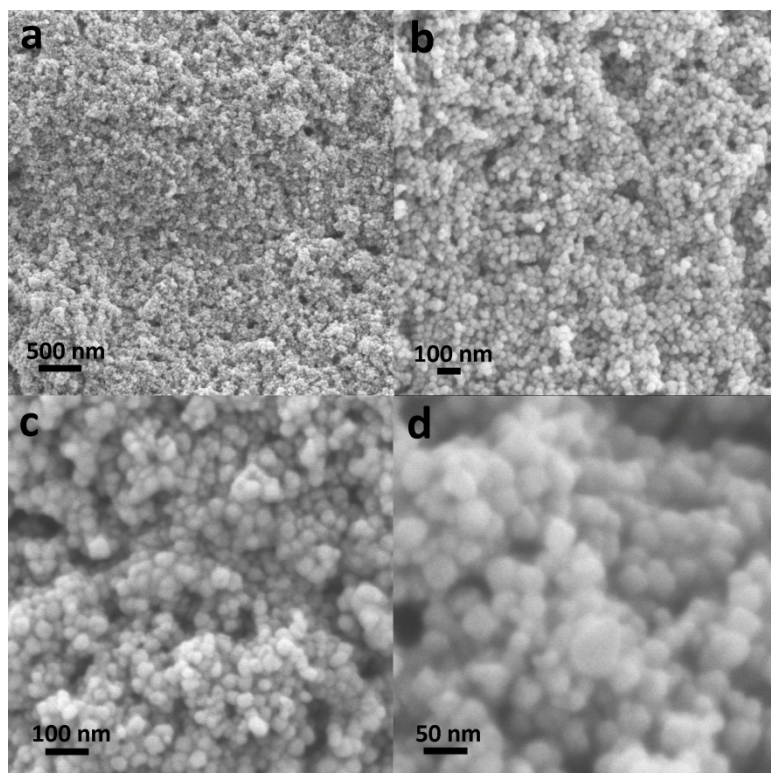

**Fig. S8.** SEM images of the pure TiO<sub>2</sub> catalyst (P25).

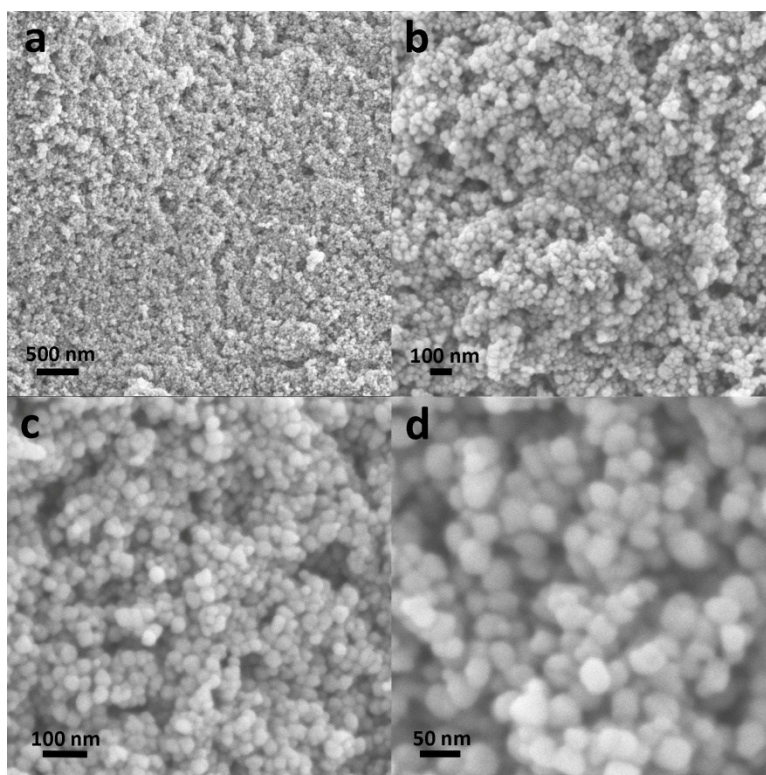

**Fig. S9.** SEM images of the as-prepared GDs-TiO<sub>2-x</sub> hybrid.

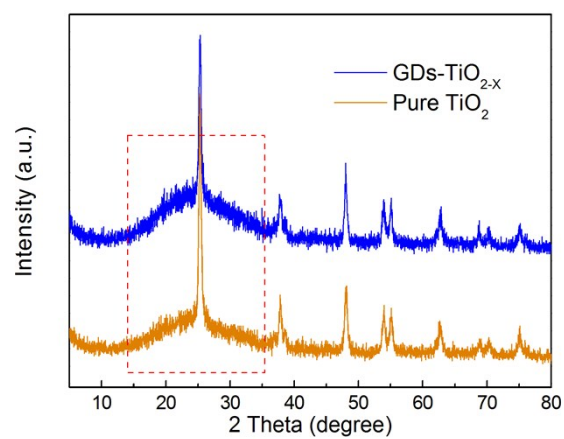

**Fig. S10.** XRD patterns of the as-prepared GDs-TiO<sub>2-x</sub> and pure TiO<sub>2</sub>.

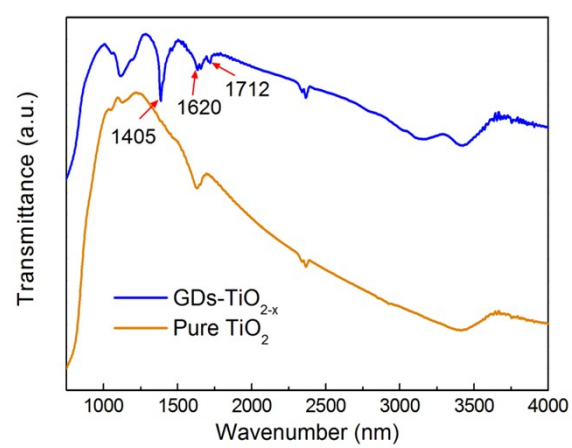

**Fig. S11.** FT-IR spectrum of the as-prepared GDs-TiO<sub>2-x</sub> and pure TiO<sub>2</sub>.

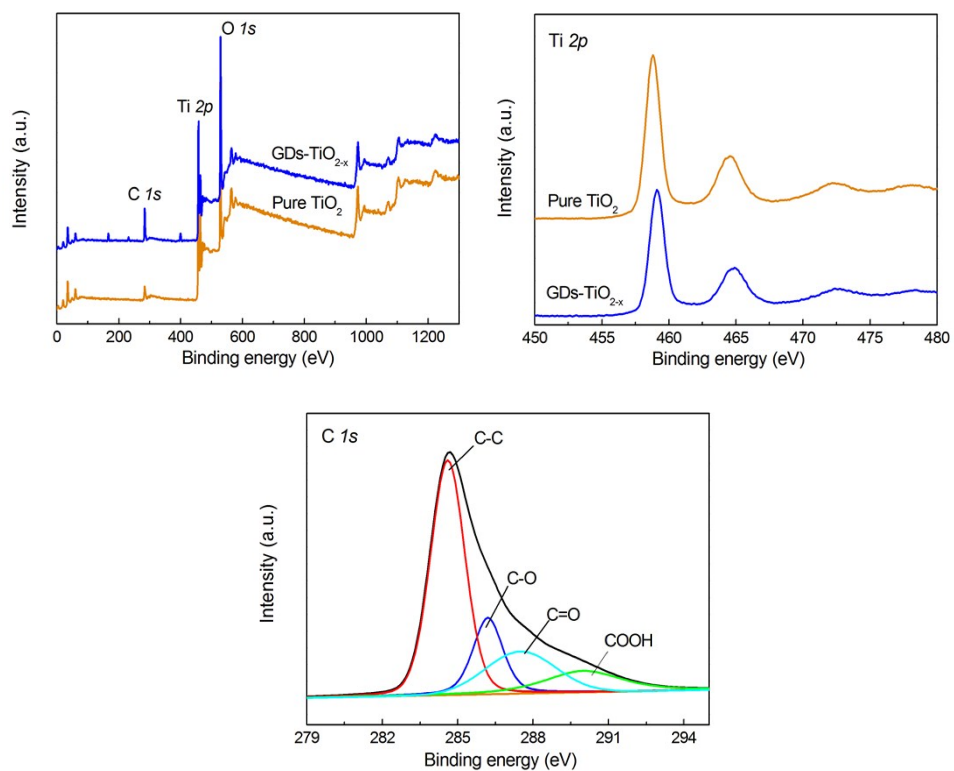

**Fig. S12.** XPS spectrum of the as-prepared GDS-TiO<sub>2-x</sub> and pure TiO<sub>2</sub>.

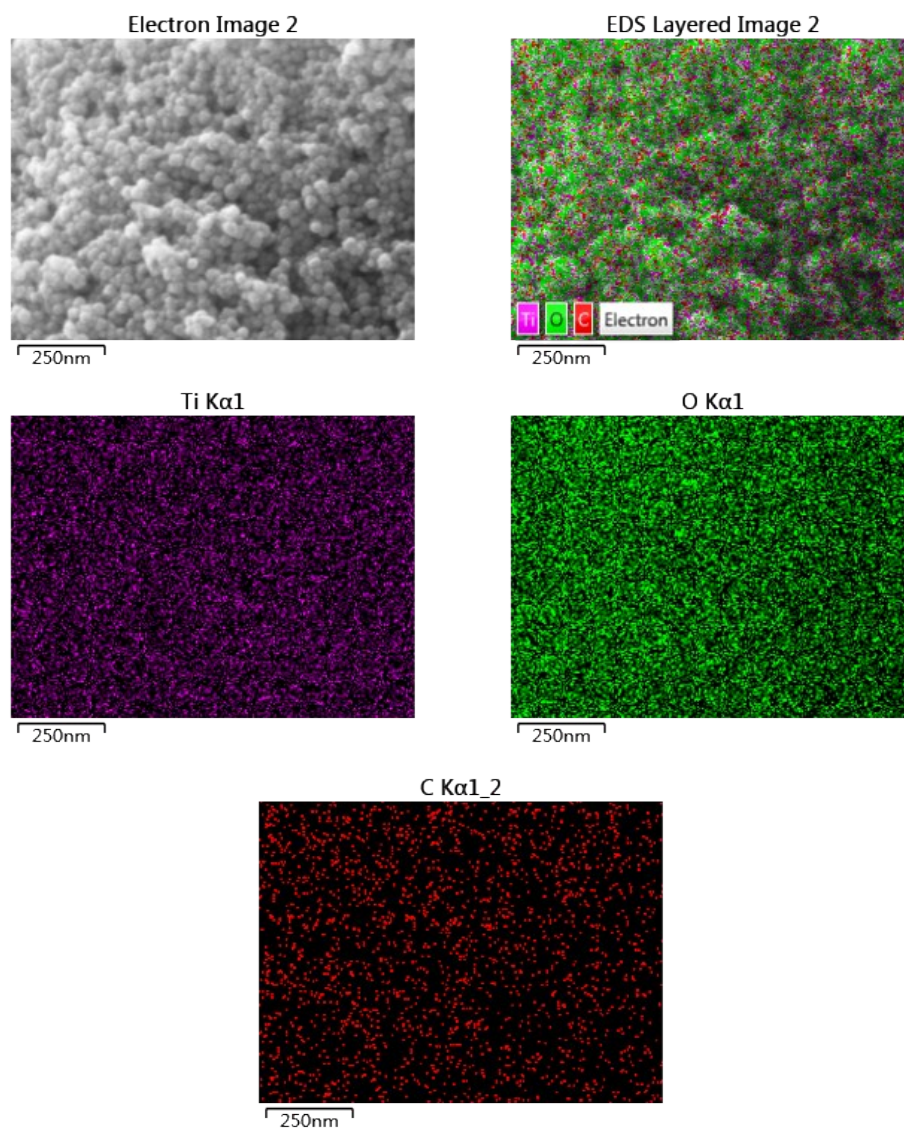

**Fig. S13.** EDX elemental mappings of the as-prepared GDs-TiO<sub>2-x</sub> hybrid.

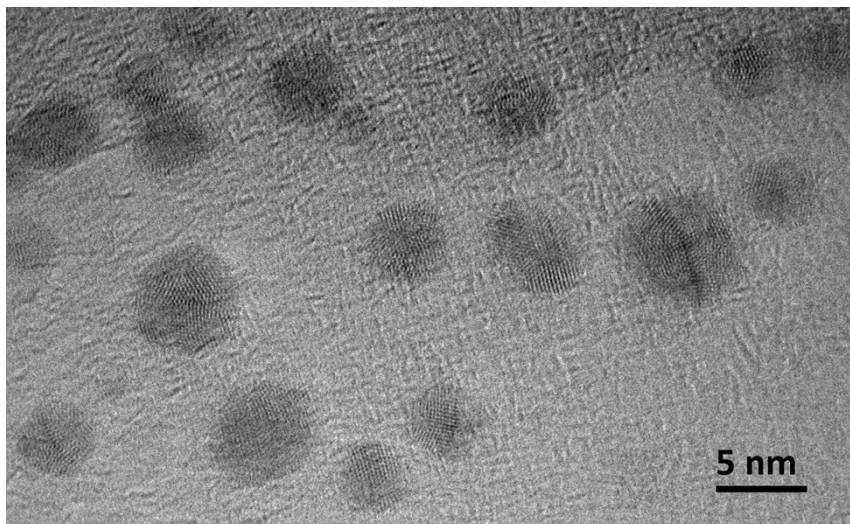

**Fig. S14.** TEM image of the as-prepared conventional GDs.

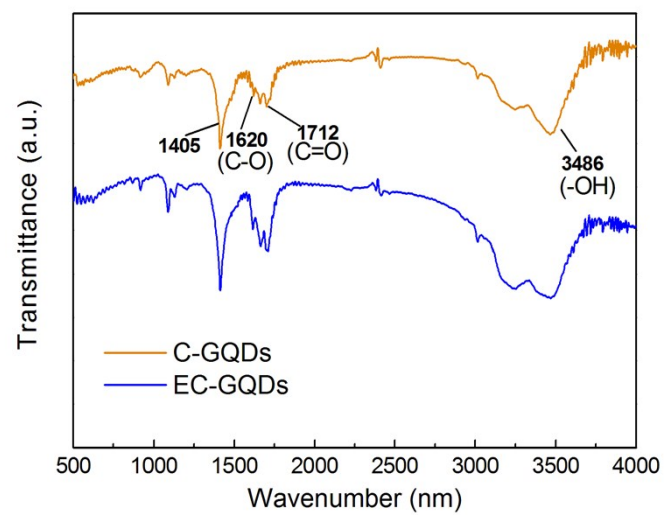

**Fig. S15.** FT-IR spectrum of the as-prepared EC-GDs and C-GDs.



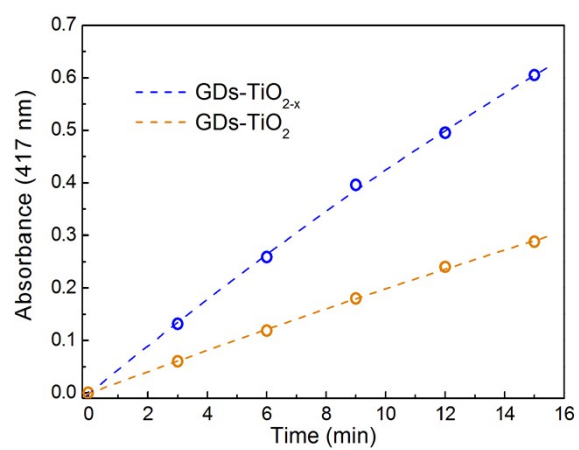

**Fig. S16.** Comparison of the •OH generation performance over GDs-TiO<sub>2-x</sub> and GDs-TiO<sub>2</sub> catalyst.

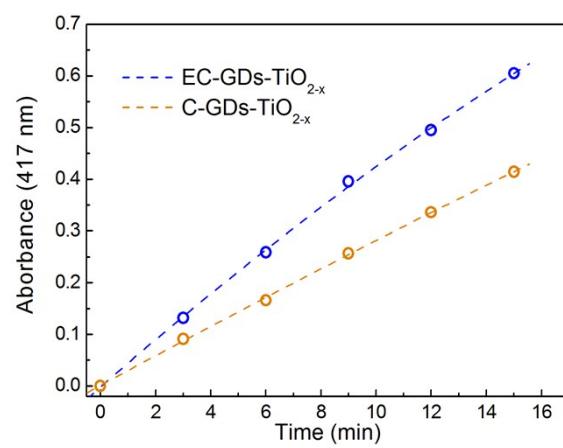

**Fig. S17.** Comparison of the •OH generation performance over EC-GDs-TiO<sub>2-x</sub> and C-GDs-TiO<sub>2</sub> catalyst.

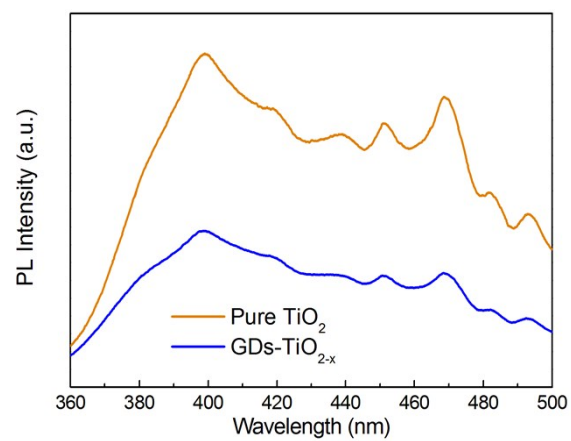

**Fig. S18.** PL spectrum of the as-prepared GDs- $\text{TiO}_{2-x}$  hybrid and pure  $\text{TiO}_2$ .

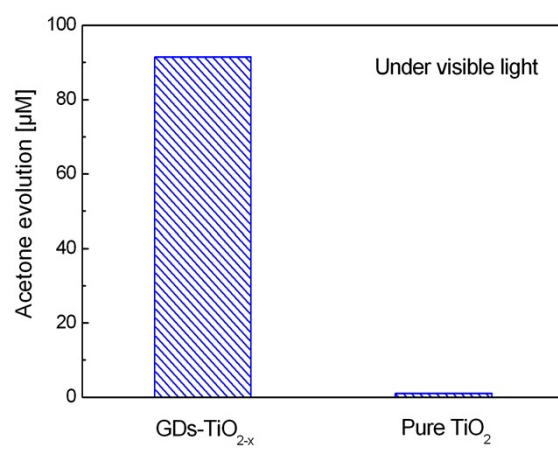

**Fig. S19.** Comparison of acetone evolution over different samples under visible-light irradiation.

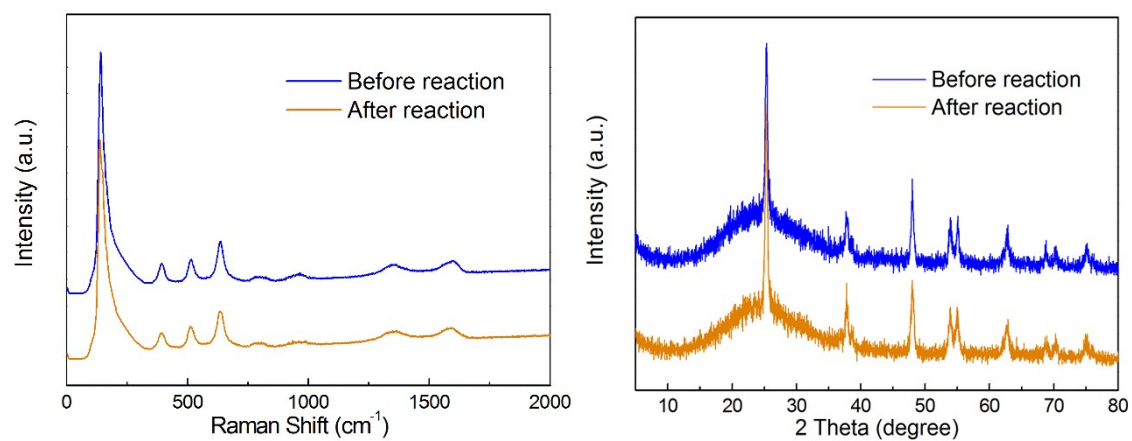

**Fig. S20.** The Raman spectrum and XRD patterns of GDs-TiO<sub>2-x</sub> hybrid before and after photocatalytic degradation.

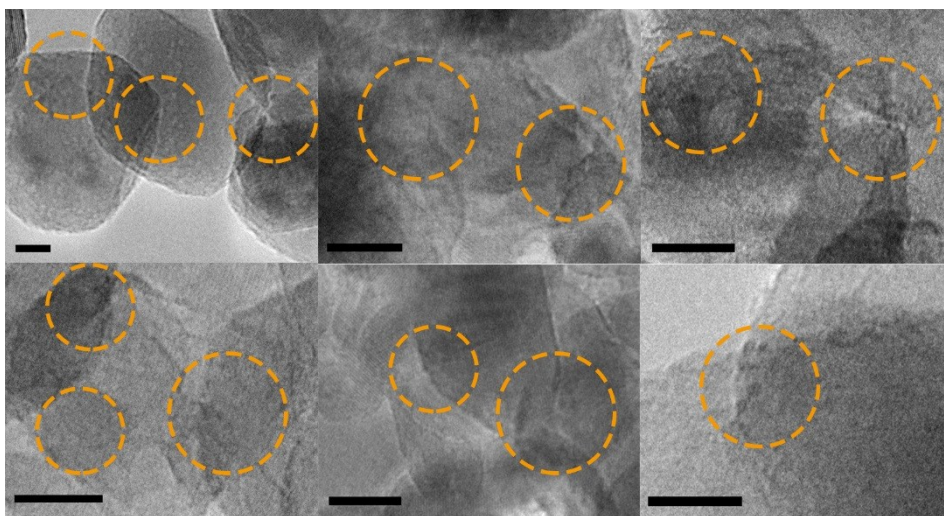

**Fig. S21.** The TEM images of the GDs-TiO<sub>2-x</sub> after ten cycles photocatalytic experiments. The surface loaded GDs were marked by orange circles. Scale bars, 10 nm.

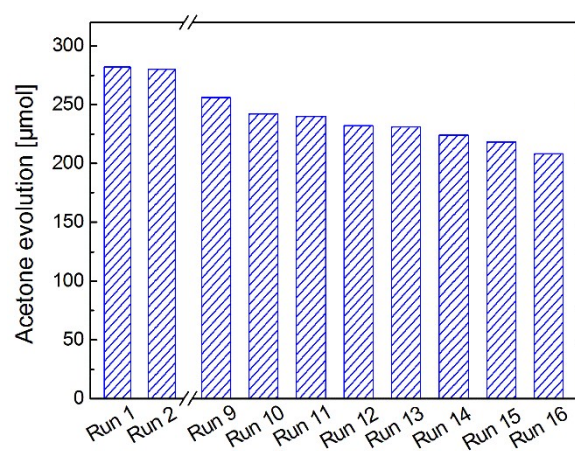

**Fig. S22.** Multi-cycle IPA photocatalytic degradation by using GDs-TiO<sub>2-x</sub> as catalyst.

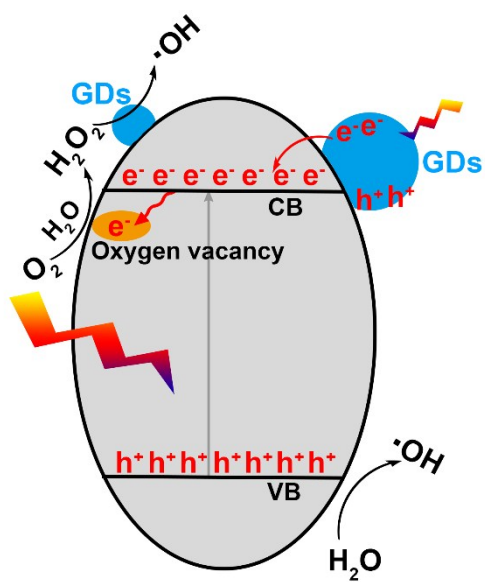

**Fig. S23** Schematic illustrating the mechanism of the entire interfacial Fenton-like reaction.



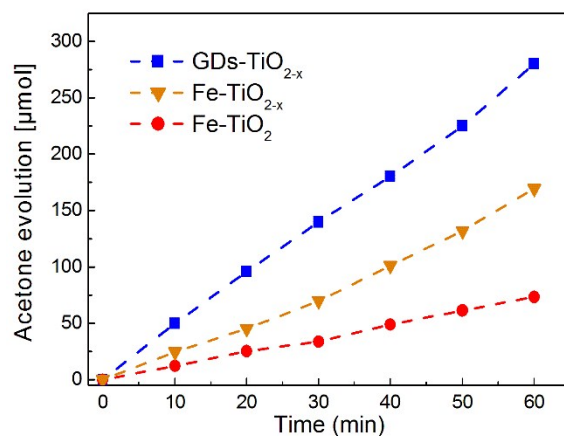

**Fig. S24** Comparison of the photocatalytic activity over GDs-TiO<sub>2-x</sub>, Fe-TiO<sub>2-x</sub> and Fe-TiO<sub>2</sub>.

In order to synthesize the Fe<sup>3+</sup> modified TiO<sub>2</sub> or TiO<sub>2-x</sub> catalysts, 60 mg of TiO<sub>2</sub> or TiO<sub>2-x</sub> were first dispersed in 30 mL of distilled water. Dilute solution of FeCl<sub>3</sub>·6H<sub>2</sub>O (99.0%) was slowly added dropwise into the above solution. The weight of fraction of Fe<sup>3+</sup> relative to TiO<sub>2</sub> or TiO<sub>2-x</sub> are 1.4 wt%. The suspension was stirred for 24 h at room temperature and then dried at 80 °C for further photocatalytic experiments<sup>14</sup>.

**Table S1** Comparison of the photocatalytic activity of different samples with different GDs loading and oxygen vacancies concentration.

| GDs (%)<br>Solvent | Water                | Water/methanol=1:<br>1 | Methanol              |
|--------------------|----------------------|------------------------|-----------------------|
| 1.0 %              | 62 $\mu\text{mol/h}$ | 116 $\mu\text{mol/h}$  | 148 $\mu\text{mol/h}$ |
| 2.0 %              | 85 $\mu\text{mol/h}$ | 186 $\mu\text{mol/h}$  | 284 $\mu\text{mol/h}$ |
| 3.0 %              | 72 $\mu\text{mol/h}$ | 142 $\mu\text{mol/h}$  | 231 $\mu\text{mol/h}$ |

To ensure the optimal ratio between the surface oxygen defects and GDs for VOCs decomposition, we investigated the photooxidation performance of different samples with different GDs loading and O-vacancies concentration. In this experiment, we control the surface oxygen vacancies concentration of as-prepared sample via changing the solvents ratio between water and methanol (the methanol exhibits strong reduction ability during the hydrothermal reaction, and hence the different solvents ratio means different reduction ability) (Fig. 3b). Moreover, we also investigated the influence of GDs loading for photooxidation performance. As shown in Table S1, when the solvent is methanol and the GDs loading is 2.0% (wt%), the as-prepared sample exhibits the most excellent photooxidation performance.

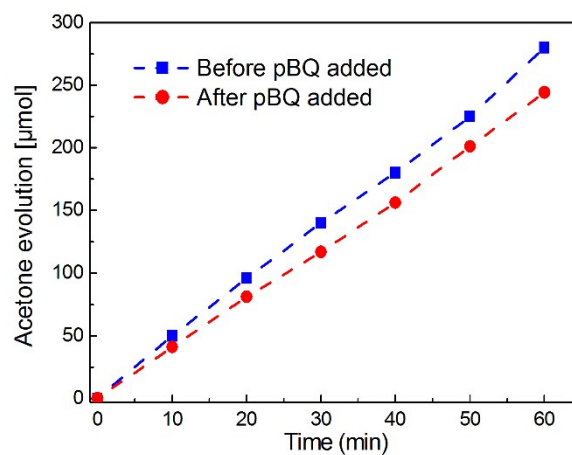

**Fig. S25** Comparison of the photocatalytic activity of GDs-TiO<sub>2-x</sub> before and after pBQ added.

To investigate the contribution of superoxide radicals generated by GDs-TiO<sub>2-x</sub> for photocatalytic IPA removal, the capture experiments were performed. In this experiment, we use p-benzoquinone (pBQ) served as the scavengers for  $\cdot\text{O}_2^-$ , and the photocatalytic IPA degradation performance were compared and shown in Fig. S25. Clearly, after the pBQ were added in the reaction system, the photocatalytic performance exhibits a little decay, indicating the  $\cdot\text{O}_2^-$  did not play an important role in IPA degradation.

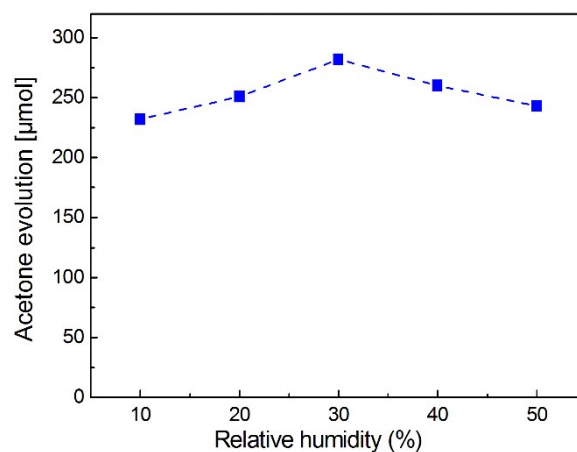

**Fig. S26** Comparison of the photocatalytic activity of GDs-TiO<sub>2-x</sub> under different relative humidity.

To investigate the influence of relative humidity for VOCs decomposition, we measured the photocatalytic activity of GDs-TiO<sub>2-x</sub> catalyst under different environment humidity. As shown in Fig. S26, the photocatalyst exhibits the most excellent photocatalytic activity when the relative humidity is about 30%, which mainly owing the too low relative humidity cannot provide abundant reactant (H<sub>2</sub>O) for photocatalytic VOC degradation, and the too high relative humidity is unbeneficial for the absorption of VOC on catalyst surface (the competitive adsorption effect from water).

**Table S2** Graphene nanodots synthesis process under various reaction conditions.

| Precursor       | Reaction condition                                                                                                                             | Method                           | Reference |
|-----------------|------------------------------------------------------------------------------------------------------------------------------------------------|----------------------------------|-----------|
| Graphite powder | Mixed with 20 mL of fuming HNO <sub>3</sub> , followed by adding 100 mL of H <sub>2</sub> SO <sub>4</sub> (98%) and stirred for 2 h at 110 °C. | Chemical oxidation               | 1         |
| Carbon black    | Refluxing carbon black powders with nitric acid (50 mL, 6 M) for 24 h.                                                                         | Chemical oxidation               | 2         |
| Carbon black    | HNO <sub>3</sub> refluxed for 24 h at 110 °C .                                                                                                 | Chemical oxidation               | 3         |
| Graphene oxide  | Sonicated in concentrated H <sub>2</sub> SO <sub>4</sub> and HNO <sub>3</sub> for 10 h                                                         | Chemical oxidation               | 4         |
| Carbon black    | Mixed with 6 mL of fuming HNO <sub>3</sub> , followed by adding 18 mL of H <sub>2</sub> SO <sub>4</sub> and stirred at 160 °C.                 | Chemical oxidation               | 5         |
| Graphene oxide  | Mixed with concentrated HNO <sub>3</sub> and H <sub>2</sub> SO <sub>4</sub> , and refluxed under microwave irradiation for 9 h                 | Chemical oxidation               | 6         |
| Graphene film   | Cyclic voltammogramic scan performed in 0.1 M Na <sub>2</sub> SO <sub>4</sub> solution by using graphene film as working electrode.            | Electrochemical tailoring method | 7         |
| Graphite paper  | Two graphite paper strips were inserted into water/ethanol solution, and a bias of 30 V was applied between the two electrodes.                | Electrochemical tailoring method | This work |

**Table S3** Photocatalysis VOCs degradation performance of different catalysts under various reaction conditions.

| Samples                                                         | Pollutant                            | Reaction Conditions                                                                    | Product Yield<br>(mol/h) | Reference        |
|-----------------------------------------------------------------|--------------------------------------|----------------------------------------------------------------------------------------|--------------------------|------------------|
| g-C <sub>3</sub> N <sub>4</sub> /WO <sub>3</sub>                | CH <sub>3</sub> CHO                  | 100 mg catalyst,<br>LED lamp, $\lambda = 435$ nm                                       | CO <sub>2</sub> , 0.9    | 8                |
| g-C <sub>3</sub> N <sub>4</sub> /TiO <sub>2</sub>               | HCHO                                 | 300 mg catalyst,<br>UV lamp                                                            | CO <sub>2</sub> , 2.8    | 9                |
| P25                                                             | (CH <sub>3</sub> ) <sub>2</sub> CHOH | 50 mg catalyst,<br>300 W Xe lamp (AM 1.5)                                              | CO <sub>2</sub> , 2.5    | 10               |
| N-TiO <sub>2</sub>                                              | (CH <sub>3</sub> ) <sub>2</sub> CHOH | 50 mg catalyst,<br>300 W Xe lamp (AM 1.5)                                              | CO <sub>2</sub> , 2.1    | 10               |
| g-C <sub>3</sub> N <sub>4</sub> /Bi <sub>2</sub> O <sub>3</sub> | (CH <sub>3</sub> ) <sub>2</sub> CHOH | 50 mg catalyst,<br>300 W Xe lamp,<br>$420 \text{ nm} \leq \lambda \leq 800 \text{ nm}$ | Acetone, 8.9             | 11               |
| CNK-OH&Fe                                                       | (CH <sub>3</sub> ) <sub>2</sub> CHOH | 50 mg catalyst,<br>300 W Xe lamp (AM 1.5)                                              | CO <sub>2</sub> , 6.1    | 10               |
| CeO <sub>2</sub> -TiO <sub>2</sub>                              | C <sub>7</sub> H <sub>8</sub>        | 40 mg catalyst,<br>Simulated sunlight                                                  | CO <sub>2</sub> , 1.26   | 12               |
| C <sub>3</sub> N <sub>4</sub> -TiO <sub>2</sub>                 | C <sub>7</sub> H <sub>8</sub>        | 40 mg catalyst,<br>Simulated sunlight                                                  | CO <sub>2</sub> , 0.648  | 13               |
| GDS-TiO <sub>2-x</sub>                                          | C <sub>7</sub> H <sub>8</sub>        | 50 mg catalyst,<br>300 W Xe lamp (AM 1.5)                                              | CO <sub>2</sub> , 5.47   | <b>This work</b> |
| GDS-TiO <sub>2-x</sub>                                          | (CH <sub>3</sub> ) <sub>2</sub> CHOH | 50 mg catalyst,<br>300 W Xe lamp (AM 1.5)                                              | CO <sub>2</sub> , 13     | <b>This work</b> |

## References

1. Y. Chong, C. C. Ge, G. Fang, X. Tian, X. C. Ma, T. Wen, W. G. Wamer, C. Y. Chen, Z. F. Chai, J. J. Yin, *ACS Nano*, 2016, 10, 8690.
2. N. Li, A. Than, X. W. Wang, S. H. Xu, L. Sun, H. W. Duan, C. J. Xu, P. Chen, *ACS Nano*, 2016, 10, 3622.
3. Z. P. Zeng, F. X. Xiao, X. C. Gui, R. Wang, B. Liu, T. Tan, *J. Mater. Chem. A*, 2016, 4, 16383.
4. Y. T. Liang, C. G. Lu, D. F. Ding, M. Zhao, D. W. Wang, C. Hu, J. S. Qiu, G. Xie, Z. Y. Tang, *Chem. Sci.*, 2015, 6, 4103.
5. S. J. Wang, I. S. Cole, Q. Li, *Chem. Commun.*, 2016, 52, 9208.
6. H. J. Sun, N. Gao, K. Dong, J. S. Ren, X. G. Qu, *ACS Nano*, 2014, 8, 6202.
7. Y. Li, Y. Hu, Y. Zhao, G. Q. Shi, L. E. Deng, Y. B. Hou, L. T. Qu, *Adv. Mater.*, 2011, 23, 776.
8. Z. Y. Jin, N. Murakami, T. Tsubota, T. Ohno, *Appl. Catal. B-Environ.* 2014, 150-151, 479.
9. J. G. Yu, S. H. Wang, J. X. Low, W. Xiao, *Phys. Chem. Chem. Phys.*, 2013, 15, 16883.
10. Y. X. Li, S. X. Ouyang, H. Xu, X. Wang, Y. P. Bi, Y. F. Zhang, J. H. Ye, *J. Am. Chem. Soc.*, 2016, 138, 13289–13297
11. Jiang, H. Y.; Liu, G. G.; Wang, T.; Li, P.; Lin, J.; Ye, J. H. *RSC Adv.*, 2015, 5, 92963.
12. M. J. Muñoz-Batista, M. Fernández-García, A. Kubacka, *Appl. Catal. B-Environ.*, 2015, 164, 261.
13. M. J. Muñoz-Batista, A. Kubacka, M. Fernández-García, *Catal. Sci. Technol.*, 2014, 4, 2006
14. Y. X. Li, S. X. Ouyang, H. Xu, X. Wang, Y. P. Bi, Y. F. Zhang, J. H. Ye, *J. Am. Chem. Soc.*, 2016, 138, 13289.
